# Supplementary material for: Estimation of Rift Valley fever virus spillover to humans during the Mayotte 2018–2019 epidemic
Source: PubMed Central journal article supplement — Proc Natl Acad Sci U S A. 2020 Sep 14;117(39):24567–74. doi: 10.1073/pnas.2004468117 (PMC7533885; doi:10.1073/pnas.2004468117), 2020-09-14
Supplement: pnas.2004468117.sapp.pdf [file pnas.2004468117.sapp.pdf]

## Supplementary Information for:

### Estimation of Rift Valley fever virus spillover to humans during the Mayotte 2018-2019 epidemic

Raphaëlle Métras<sup>\*a,b,c</sup>, W John Edmunds<sup>d</sup>, Chouanibou Youssouffi<sup>e</sup>, Laure Dommergues<sup>f</sup>, Guillaume Fournié<sup>g</sup>, Anton Camacho<sup>d,h</sup>, Sebastian Funk<sup>d</sup>, Eric Cardinale<sup>b,i</sup>, Gilles Le Godais<sup>j</sup>, Sohibou Combo<sup>j</sup>, Laurent Filleul<sup>k</sup>, Hassani Youssouf<sup>†k</sup>, Marion Subiros<sup>†k</sup>

† these authors share last authorship

<sup>a</sup> Inserm, Sorbonne Université, Institut Pierre Louis d'Épidémiologie et de Santé Publique (IPLESP), 27 rue Chaligny, 75012 Paris, France.

<sup>b</sup> CIRAD, UMR ASTRE, Campus International de Baillarguet, 34398 Montpellier, France

<sup>c</sup> ASTRE, Univ Montpellier (I-MUSE), CIRAD, INRA, 34398 Montpellier, France

<sup>d</sup> Centre for the Mathematical Modelling of Infectious Diseases, Department of Infectious Disease Epidemiology, London School of Hygiene & Tropical Medicine, Keppel Street WC1E 7HT, London, United Kingdom

<sup>e</sup> GSD Mayotte-Coopérative Agricole des Eleveurs Mahorais, 97670 Coconi, Mayotte, France

<sup>f</sup> La Coopération Agricole, 43 rue Sedaine, F-75538 Paris, France

<sup>g</sup> Veterinary Epidemiology, Economics and Public Health group, Department of Pathobiology and Population Sciences, The Royal Veterinary College, Hatfield, United Kingdom

<sup>h</sup> Epicentre, 14-34 avenue Jean Jaurès, 75019 Paris, France

<sup>i</sup> CIRAD, UMR ASTRE, F-97490 Sainte Clotilde, La Réunion, France

<sup>j</sup> Direction de l'Alimentation, de l'Agriculture et de la Forêt de Mayotte, Mamoudzou, France

<sup>k</sup> Santé Publique France, Mamoudzou, Mayotte, France

\* Corresponding author: Raphaëlle Métras

Email: [raphaelle.metras@inserm.fr](mailto:raphaelle.metras@inserm.fr)

#### This PDF file includes:

Supplementary text  
Figures S1 to S2AC  
Tables S1 to S9  
SI References

## Supplementary Information Text

### Mathematical model: equations, parameter estimation, fitting and vaccination scenarios

#### SI Methods

The schematic diagram of the model is presented in Fig. 2 (main text), and the assumptions on viral transmission are presented in Table S1.

#### Model in livestock

The livestock population was stratified into 10 yearly age-groups (noted  $a$ ,  $a \in [1,10]$ ), as in Metras *et al.* 2017 (1). The model equations are presented in Eq. S1a-S1m. The force of infection of RVF virus between livestock ( $\lambda_{L-L}(t)$ ) (Eq. S2a) was assumed to be vector-borne and modelled as an exponential function of rainfall (2). Rainfall was used as a proxy for vector abundance, and varying over time (Eq. S2b and S2c). Indexing the state variables by yearly age-group  $a$ , and time  $t$ , the model in livestock is expressed as follows:

For  $\leq 12$  months-old animals (i.e. age group  $a=1$ ):

$$S_{1,t+1} = (1 - \lambda_{L-L,t})(1 - \delta) \alpha S_{1,t} + b_t \quad (\text{Eq. S1a})$$

$$E_{1,t+1} = (1 - \delta)(1 - v_L) \alpha E_{1,t} + \lambda_{L-L,t}(1 - \delta) \alpha S_{1,t} \quad (\text{Eq. S1b})$$

$$I_{1,t+1} = (1 - \delta)(1 - r_L) \alpha I_{1,t} + (1 - \delta) v_L \alpha E_{1,t} \quad (\text{Eq. S1c})$$

$$R_{1,t+1} = (1 - \delta) \alpha R_{1,t} + (1 - \delta) r_L \alpha I_{1,t} \quad (\text{Eq. S1d})$$

For  $> 12$  months-old to  $\leq 108$  months-old animals (i.e. age groups  $a \in [2-9]$ ):

$$S_{a,t+1} = (1 - \lambda_{L-L,t})(1 - \delta) \alpha S_{a,t} + (1 - \lambda_{L-L,t}) \delta \alpha S_{a-1,t} \quad (\text{Eq. S1e})$$

$$E_{a,t+1} = (1 - \delta)(1 - v_L) \alpha E_{a,t} + \lambda_{L-L,t} \alpha S_{a,t} + \lambda_{L-L,t} \delta \alpha S_{a-1,t} \quad (\text{Eq. S1f})$$

$$I_{a,t+1} = (1 - \delta)(1 - r_L) \alpha I_{a,t} + (1 - \delta) v_L \alpha E_{a,t} + \delta \alpha E_{a-1,t} \quad (\text{Eq. S1g})$$

$$R_{a,t+1} = (1 - \delta) \alpha R_{a,t} + (1 - \delta) r_L \alpha I_{a,t} + \delta \alpha I_{a-1,t} + \delta \alpha R_{a-1,t} \quad (\text{Eq. S1h})$$

For  $> 108$  months-old animals (i.e. age group  $a = 10$ ):

$$S_{10,t+1} = (1 - \lambda_{L-L,t}) \alpha_{10} S_{10,t} + (1 - \lambda_{L-L,t}) \delta \alpha S_{9,t} \quad (\text{Eq. S1i})$$

$$E_{10,t+1} = (1 - \delta)(1 - v_L) \alpha E_{10,t} + \lambda_{L-L,t} \alpha_{10} S_{10,t} + \lambda_{L-L,t} \delta \alpha S_{9,t} \quad (\text{Eq. S1j})$$

$$I_{10,t+1} = (1 - \delta)(1 - r_L) \alpha I_{10,t} + (1 - \delta) v_L \alpha E_{10,t} + \delta \alpha E_{9,t} \quad (\text{Eq. S1k})$$

$$R_{10,t+1} = (1 - \delta) \alpha R_{10,t} + (1 - \delta) r_L \alpha I_{10,t} + \delta \alpha I_{9,t} + \delta \alpha R_{9,t} \quad (\text{Eq. S1l})$$

With:

$$b_t = (1 - \alpha) \sum_{a=1}^{10} (S_{a,t} + E_{a,t} + I_{a,t} + R_{a,t}) \quad (\text{Eq. S1m})$$

The force of infection amongst livestock was defined as:

$$\lambda_{L-L,t} = 1 - \exp\left(-\beta_{L-L,t} \sum_{a=1}^{10} I_{a,t}\right) \quad (\text{Eq. S2a})$$

With

$$\beta_{L-L,t} = \frac{R_{s,t}}{N_L D_L} \quad (\text{Eq. S2b})$$

and

$$R_{s,t} = \exp(A \text{Rainfall}_{t-LAG} + B) \quad (\text{Eq. S2c})$$

Where  $I_{a,t}$  is the number of infectious livestock in age-group  $a$ , at time  $t$ .  $\beta_{L-L,t}$  is the rate of virus transmission between livestock,  $R_{s,t}$  is the seasonal reproductive number at time  $t$ ,  $N_L$  the total livestock population size,  $D_L$  the duration of infectiousness in livestock,  $\text{Rainfall}_{t-LAG}$  the value of rainfall 14 days ( $LAG=14$  days) prior to time  $t$ , and  $A$  and  $B$ , the multiplying and scaling factors of the exponential function linking  $R_{s,t}$  to rainfall.  $A$  and  $B$  are estimated by fitting the model to data (see paragraph on model fitting). The formulation of  $R_{s,t}$  does not take account for the mortality of infected animals, as the mortality rates were much lower than the rates at which infected animals became infectious and infectious animals recovered from infection (1). Finally, as a base case, we allowed for a 14-days lag between rainfall and the presence of vectors (3,4), and ran also the model with a 21-days lag ('21-days lag case', Table S3).

We define  $R_{e,t}$ , the effective reproductive number, varying over time, as a function of  $R_{s,t}$  multiplied by the proportion of susceptible animals at time  $t$ :

$$R_{e,t} = R_{s,t} \sum_{a=1}^{10} S_{a,t} / N_L \quad (\text{Eq. S2d})$$

### **Modelling virus spillover to humans**

We added the human compartment to study RVF virus spillover, that is, the transmission of RVF virus from livestock to humans (Fig. 2, Table S1). The human population was divided into two groups: 'farming' and 'non-farming'.

In the farming group, susceptible humans  $S_{HF}$  were assumed to get infected  $E_{HF}$  by direct contact with animals and their tissues at a constant rate  $\beta_{L-H}^C$ , and by the vector-mediated route at a time-varying rate  $\beta_{L-H,t}^V$ , before becoming successively infectious  $I_{HF}$  and immune  $R_{HF}$ . In the non-farming group, susceptible humans,  $S_{HNF}$ , acquired infection  $E_{HNF}$  only via the vector-mediated route, at a time-varying rate  $\beta_{L-H,t}^V$ , then became infectious  $I_{HNF}$  and immune  $R_{HNF}$ .

In the 'farming' group, the model is expressed as follows (Eq. S3a-S3f):

$$S_{HF,t+1} = (1 - \lambda_{F,t}) S_{HF,t} \quad (\text{Eq. S3a})$$

$$E_{HF,t+1} = \lambda_{F,t} S_{HF,t} + (1 - v_H) E_{HF,t} \quad (\text{Eq. S3b})$$

$$I_{HF,t+1} = v_H E_{HF,t} + (1 - r_H) I_{HF,t} \quad (\text{Eq. S3c})$$

$$R_{HF,t+1} = R_{HF,t} + r_H I_{HF,t} \quad (\text{Eq. S3d})$$

With the force of infection in the farming group  $\lambda_{F,t}$ :

$$\lambda_{F,t} = 1 - \exp \left( - \left( \beta_{L-H,t}^V + \beta_{L-H}^C \right) \sum_{a=1}^{10} I_{a,t} \right) \quad (\text{Eq. S3e})$$

and the number of  $S_{HF,t0}$  at  $t_0$ :

$$S_{HF,t0} = N_H P_{HF} \quad (\text{Eq. S3f})$$

In the 'non-farming' group, the model is expressed as follows (Eq. S4a-S4f):

$$S_{HNF,t+1} = (1 - \lambda_{NF,t}) S_{HNF,t} \quad (\text{Eq. S4a})$$

$$E_{HNF,t+1} = \lambda_{NF,t} S_{HNF,t} + (1 - v_H) E_{HNF,t} \quad (\text{Eq. S4b})$$

$$I_{HNF,t+1} = v_H E_{HNF,t} + (1 - r_H) I_{HNF,t} \quad (\text{Eq. S4c})$$

$$R_{HNF,t+1} = R_{HNF,t} + r_H I_{HNF,t} \quad (\text{Eq. S4d})$$

With the force of infection in the non-farming group  $\lambda_{NF,t}$ :

$$\lambda_{NF,t} = 1 - \exp \left( - \beta_{L-H,t}^V \sum_{a=1}^{10} I_{a,t} \right) \quad (\text{Eq. S4e})$$

and the number of  $S_{HNF,t0}$  at  $t_0$ :

$$S_{HNF,t0} = N_H (1 - P_{HF}) \quad (\text{Eq. S4f})$$

$\beta_{L-H}^C$  was the transmission parameter corresponding to the rate at which an individual in the farming group becomes infected following direct contact with infectious livestock from all age groups ( $I_{a,t}$ ), between  $t$  and  $t+1$ . This rate was assumed to remain constant over time.  $\beta_{L-H,t}^V$  was the transmission parameter corresponding to the rate at which humans acquire infection from infectious livestock from all age groups ( $I_{a,t}$ ) through the mediation of vectors, between time  $t$  and  $t+1$ .  $\beta_{L-H,t}^V$  was assumed to vary over time as a function of rainfall, and was defined relative to  $\beta_{L-L,t}$  (Eq. S2a and S2b), such as :

$$\beta_{L-H,t}^V = X \beta_{L-L,t} \quad (\text{Eq. S5})$$

With  $X \in [0,1]$ , the human vector transmission scaling factor (Table S2), defining the rate of transmission from livestock to humans, relative to within livestock transmission.

The parameters  $\beta_{L-H}^C$  and  $X$  are also estimated by fitting the model to data (see paragraph on model fitting).

The weekly number of human incident cases in the farming  $Inc_{HF,w}$  and the non-farming  $Inc_{HNF,w}$  groups are expressed as follows:

$$Inc_{HF,w} = \sum_{t=1}^7 v_H E_{HF,t} \quad (\text{Eq. S6a})$$

$$Inc_{HNF,w} = \sum_{t=1}^7 v_H E_{HNF,t} \quad (\text{Eq. S6b})$$

The weekly number of incident cases resulting from direct contact  $Inc_w^C$  and vector-mediated  $Inc_w^V$  transmissions were equal to:

$$Inc_w^C = \sum_{t=1}^7 v_H E_{HF,t} \frac{\beta_{L-H}^C}{\beta_{L-H}^C + \beta_{L-H,t}^V} \quad (\text{Eq. S6c})$$

$$Inc_w^V = Inc_{HNF,w} + \sum_{t=1}^7 v_H E_{HF,t} \frac{\beta_{L-H,t}^V}{\beta_{L-H}^V + \beta_{L-H,t}^V} \quad (\text{Eq. S6d})$$

### **Model fitting and parameter estimation**

We fitted the model simultaneously to livestock and human data by sampling from the posterior distributions of all five parameters  $\theta = \{A, B, \beta_{L-H}^C, X, I_{L,t0}\}$ , using a Monte Carlo Markov Chain Metropolis-Hastings algorithm (5), and assuming uniform priors (Table S2).

**Fitting the model to livestock data.** The estimation of parameters was done by fitting the quarterly ( $q$ ) age-stratified simulated proportion of immune livestock  $p_{a,q}$ , to the quarterly age-stratified serological data from January to June 2019 (Table S8). The fitting was done over two trimesters (noted  $q$ ), January to March 2019, and April to June 2019, such as :

$$p_{a,q} = R_{a,q} / N_a, a \in [1,10] \quad (\text{Eq. S7a})$$

The number of positive IgG animals per quarter in the age-group  $a$ ,  $x_{a,q}$  among the  $n_{a,q}$  tested over that same period of time, followed a binomial distribution :

$$x_{a,q} \sim \text{Bin}(n_{a,q}, p_{a,q}) \quad (\text{Eq. S7b})$$

The log-likelihood of the livestock data  $Loglik_L$  was expressed as follows :

$$Loglik_L(\text{data}|\theta) = \sum_q \sum_a l_{La,q}(x_{a,q}, n_{a,q}|\theta) \quad (\text{Eq. S7c})$$

with :

$$Loglik_{La,q}(x_{a,q}, n_{a,q}|\theta) = x_{a,q} \log p_{a,q} + (n_{a,q} - x_{a,q}) \log(1 - p_{a,q}) \quad (\text{Eq. S7d})$$

**Fitting the model to human data.** We fitted (i) the simulated weekly number of reported incident cases in the ‘farming’ population  $Cases_{HF,w}$  to the observed cases reporting a contact with animals  $y_{HF,w}$  (Table 9, Fig. 1B, Eq. S8a-S8d) and (ii) the simulated weekly number of reported incident cases in the ‘non-farming’ population  $Cases_{HNF,w}$  to the observed cases not reporting a prior contact with animals  $y_{HNF,w}$  (Table 9, Fig. 1C, Eq. S9a-S9d); and  $\rho$  being the reporting fraction. The observed weekly number of reported human cases in the farming and non-farming groups, noted  $y_{HF,w}$  and  $y_{HNF,w}$  followed a Poisson distribution, and the corresponding log-likelihood  $LogLik_{HF}$  and  $LogLik_{HNF}$  are presented in the following equations.

For cases assumed to result from the farming group:

$$Cases_{HF,w} = \rho Inc_{HF,w} \quad (Eq. S8a)$$

$$y_{HF,w} \sim Pois(Cases_{HF,w}) \quad (Eq. S8b)$$

$$LogLik_{HF}(data|\theta) = \sum_w LogLik_{HF,w}(y_{HF,w}|\theta) \quad (Eq. S8c)$$

$$LogLik_{HF,w}(y_{HF,w}|\theta) = \sum_{week} (y_{HF,w}) \log Cases_{HF,w} - Cases_{HF,w} - \log (y_{HF,w}!) \quad (Eq. S8d)$$

Similarly, the log-likelihood for cases assumed to result from the non-farming group :

$$Cases_{HNF,w} = \rho Inc_{HNF,w} \quad (Eq. S9a)$$

$$y_{HNF,w} \sim Pois(Cases_{HNF,w}) \quad (Eq. S9b)$$

$$LogLik_{HNF}(data|\theta) = \sum_{week} LogLik_{HNF,w}(y_{HNF,w}|\theta) \quad (Eq. S9c)$$

$$LogLik_{HNF,w}(y_{HNF,w}|\theta) = \sum_{week} (y_{HNF,w}) \log Cases_{HNF,w} - Cases_{HNF,w} - \log (y_{HNF,w}!) \quad (Eq. S9d)$$

The overall log-likelihood of the data  $LogLik_{all}$ , livestock and human, is given by :

$$LogLik_{all}(data|\theta) = LogLik_L(data|\theta) + LogLik_{HF}(data|\theta) + LogLik_{HNF}(data|\theta) \quad (Eq. S10)$$

We ran two MCMC-MH chains of 100,000 iterations (5). We checked for convergence to the same stationary distribution. We discarded the first 10,000 iterations of the burn-in periods and thinned at a ratio of 1:10 to eliminate auto-correlation. We then combined both chains. The values of the median, 95% Credible Interval (CrI) of the posterior distributions for each estimated parameter are presented in Table S3, and for each case (‘base case’, ‘21-days lag case, and ‘10-90 case’).

### **Vaccination forecasts**

Using the ‘base case’ estimated parameters we simulated vaccination scenarios. The expected number of efficacious doses  $V_{ed}$  administered (to livestock or humans) followed a binomial distribution, with  $V$  being the number of vaccine doses, and  $V_e$  the vaccine efficacy :

$$V_{ed} \sim Bin(V, V_e) \quad (Eq. 11a)$$

For livestock, the number of doses administered was based on potential emergency vaccination feasible in Mayotte. For humans, since no vaccine exists yet, the number of vaccine doses administered in both farming  $V_{edF}$  and non-farming  $V_{edNF}$  groups were set as a percentage vaccination coverage of the farming  $V_{CHF}$  and non-farming  $V_{CHNF}$  populations, so that :

$$V_{edF} = V_{CHF} N_H P_{HF} \quad (\text{Eq. 11b})$$

$$V_{edNF} = V_{CHNF} N_H P_{HNF} \quad (\text{Eq. 11c})$$

The number of efficacious vaccines administered at time  $t$  (to livestock or humans),  $V_{ed,t}$ , followed a multinomial distribution, with  $n_{days}$  being the length of the vaccination campaign in days:

$$V_{ed,t} \sim \text{Multinom}(V_{ed}, n_{days}) \quad (\text{Eq. 11d})$$

For livestock, the daily number of efficacious vaccines administered per age-group  $a$ ,  $V_{aed,t}$ , followed a multinomial distribution, accounting for the proportion of livestock per age-group ( $P_a$ ), as per the age-population structure of the underlying livestock demographic structure (1):

$$V_{aed,t} \sim \text{Multinom}(V_{ed,t}, P_a) \quad (\text{Eq. 11e})$$

Over the period of the vaccination campaign, and every day, vaccinated individuals or livestock moved from Susceptible livestock (S) to Susceptibles Vaccinated (SV). Susceptibles Vaccinated (SV) moved to Protected Vaccinated (PV) at a rate  $\gamma$  corresponding to the time to build-up immunity. During that time, a fraction of SV could become infected and move to  $E$  (Fig. S1). For livestock, indexing by yearly age-group  $a$ , the corresponding vaccination equations are expressed as follows in the Eq. S12a-S12d. The equations for humans are expressed similarly, without the yearly age-group index  $a$  :

$$S_{a,t+1} = S_{a,t} - V_{aed,t} + [\dots] \quad (\text{Eq. 12a})$$

$$SV_{a,t+1} = SV_{a,t} + V_{aed,t} - \lambda_{L-L,t} SV_{a,t} - \gamma SV_{a,t} \quad (\text{Eq. 12b})$$

$$PV_{a,t+1} = PV_{a,t} + \gamma SV_{a,t} \quad (\text{Eq. 12c})$$

$$E_{a,t+1} = PV_{a,t} + \lambda_{L,t} SV_{a,t} + [\dots] \quad (\text{Eq. 12d})$$

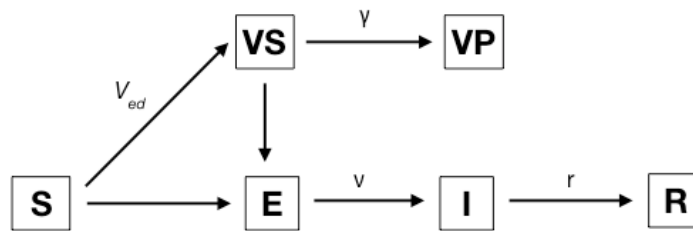

**Fig. S1. Model diagram showing vaccination.** Susceptibles (S) moved to Vaccinated Susceptibles (VS) upon vaccination with  $V_{ed}$  doses. VS moved successively to Vaccinated Protected (VP) at a  $\gamma$  rate, corresponding to the time to build-up immunity. During that time, VS could also become infected (E), from infectious livestock.

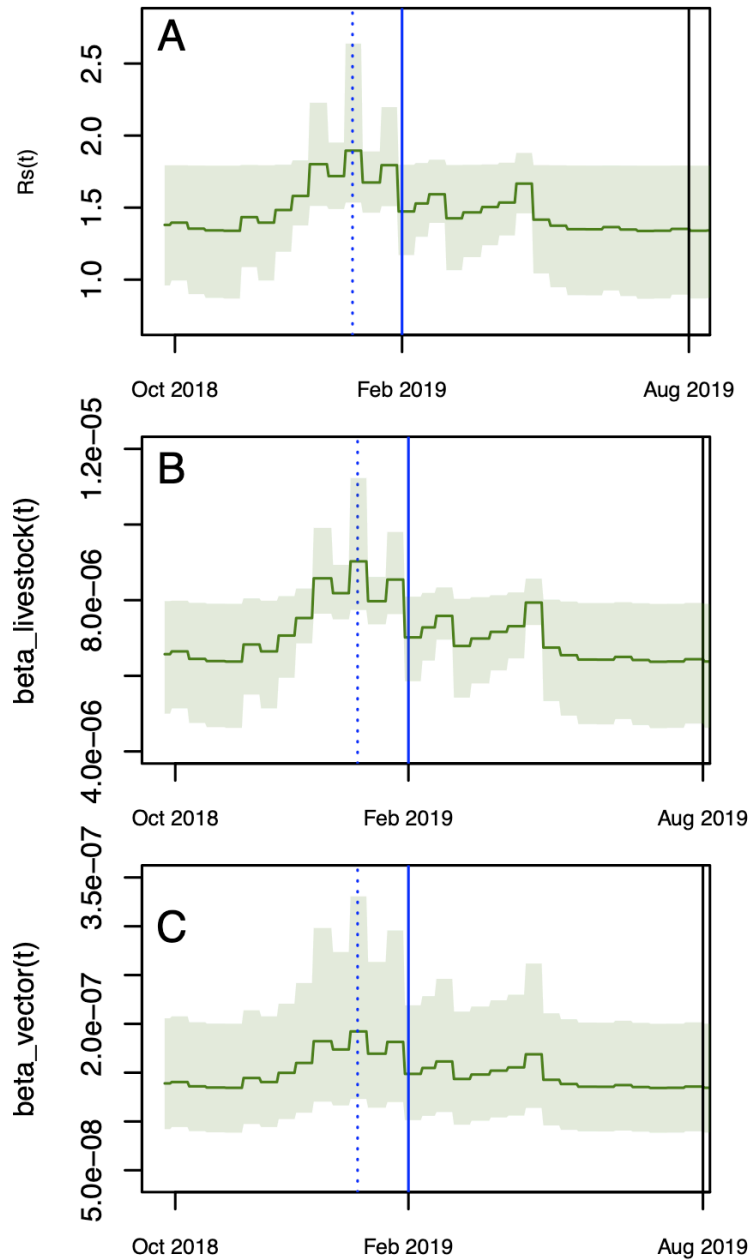

**Fig. S2AC. Time-varying transmission parameters over the fitting period. (A) Rainfall-dependent reproductive number  $R_{s,t}$  (B) Transmission rate amongst livestock  $\beta_{L-L,t}$  (C) Vector-mediated transmission rate from humans to livestock  $\beta_{L-H,t}^V$ . Median (green line) and 95%CrI (green envelopes). The vertical dotted blue lines show the time of the highest values, and the solid blue lines the time of the predicted epidemic peak. The vertical black line corresponds to the end of the fitting period (August 2019).**



**Table S1. Model assumptions on viral transmission**

| Assumptions on viral transmission                    |                                                                                                     |                                                        |
|------------------------------------------------------|-----------------------------------------------------------------------------------------------------|--------------------------------------------------------|
| amongst livestock                                    | spillover livestock-human                                                                           |                                                        |
|                                                      | farming population                                                                                  | non-farming population                                 |
| - vector mediated $\beta_{L-L,t}$ rainfall-dependent | - direct contact $\beta_{L-H}^C$ constant<br>- vector-mediated $\beta_{L-H,t}^V$ rainfall-dependent | - vector-mediated $\beta_{L-H,t}^V$ rainfall-dependent |

**Table S2. Model parameters.** notations, values or prior distribution, source or estimated by fitting model to data

| Parameter description                                             | Notation        | Values/prior distribution                 | Source/Estimated                      |
|-------------------------------------------------------------------|-----------------|-------------------------------------------|---------------------------------------|
| <b>Natural history of disease &amp; demographics in livestock</b> |                 |                                           |                                       |
| Total population size                                             | $N_L$           | 30,000                                    | (1)                                   |
| Latent period livestock                                           | $1/V_L$         | 7 days                                    | (1)                                   |
| Infectious period livestock                                       | $1/r_L=D_L$     | 7 days                                    | (1)                                   |
| Number of age groups                                              | $a$             | 10                                        | (1)                                   |
| Daily aging factor                                                | $\delta$        | 1/365                                     | -                                     |
| Daily survival rate age-groups 1-9                                | $\alpha$        | 0.9988                                    | (1)                                   |
| Daily survival rate age-groups 10                                 | $\alpha_{10}$   | 0.9992                                    | (1)                                   |
| Daily death rate age-groups 1-9                                   | $\mu$           | 1.2e-3                                    | (1)                                   |
| Daily death rate age-groups 10                                    | $\mu_{10}$      | 8e-4                                      | (1)                                   |
| Latent livestock at t0                                            | $E_{L,t0}$      | 0                                         | Initial value                         |
| Infectious livestock at t0                                        | $I_{L,t0}$      | Uniform [1-1000]                          | Estimated by fitting model to data    |
| Immune at t0 in each age-group, $a=[1,10]$                        | $R_{L,t0}$      | {0,0,0.042,0,0,0.095,0.083,0.166,0,0.451} | Data Vet Services Sept 2018 (Fig. 1D) |
| <b>Natural history of disease &amp; demographics in humans</b>    |                 |                                           |                                       |
| Human population size                                             | $N_H$           | 256,500                                   | (6)                                   |
| Fraction farming population                                       | $P_{HF}$        | {0.3, 0.1}                                | (7)                                   |
| Fraction non-farming population                                   | $P_{HNF}$       | {0.7, 0.9}                                | (7)                                   |
| Latent period humans                                              | $1/V_H$         | 4 days                                    | (8)                                   |
| Infectious period humans                                          | $1/r_H$         | 5 days                                    | (8)                                   |
| Reporting fraction of cases                                       | $\rho$          | 0.019 (0.014 – 0.026)                     | (9)                                   |
| <b>Transmission-related parameters</b>                            |                 |                                           |                                       |
| Multiplying factor of the exponential function                    | $A$             | Uniform [0,5]                             | Estimated by fitting model to data    |
| Scaling factor of the exponential function                        | $B$             | Uniform [-5,5]                            | Estimated by fitting model to data    |
| Human vector transmission scaling factor                          | $X$             | Uniform [1e-3 - 1]                        | Estimated by fitting model to data    |
| Constant livestock-human transmission                             | $\beta_{L-H}^C$ | Uniform [1e-9 – 5 e-6]                    | Estimated by fitting model to data    |
| Rainfall lag                                                      | $LAG$           | {14,21} days                              | (2-4)                                 |
| <b>Vaccination parameters</b>                                     |                 |                                           |                                       |
| Number of vaccine doses in livestock                              | $V$             | {3000, 6000,9000}                         | CoopADEM data                         |

|                                       |            |                           |         |
|---------------------------------------|------------|---------------------------|---------|
| Vaccine coverage in farming group     | $V_{CHF}$  | {0.8,0.5}                 | Assumed |
| Vaccine coverage in non-farming group | $V_{CHNF}$ | {0,0.5}                   | Assumed |
| Number of vaccination days            | $n_{days}$ | 31 (December and January) | Assumed |
| Vaccine efficacy (target)             | $V_e$      | 0.9                       | (10)    |
| Time to immunity (optimal)            | $1/\gamma$ | 14                        | (11)    |

**Table S3. Estimated parameters (median, 95% credible intervals CrI) and corresponding predicted epidemic sizes and timing of the peaks.** Parameters were estimated for three cases: (1) the 'base case', defined by a proportion of the farming population set at  $P_{HF}=30\%$  and a 14-days rainfall lag; (2) the '21-days lag case' defined by  $P_{HF}=30\%$  and a 21-days rainfall lag; and (3) the '10-90 case' defined by  $P_{HF}=10\%$  and a 14-days rainfall lag.

| Name                                                   |                 | 'Base case'                     | '21-days lag case'             | '10-90 case'                    |
|--------------------------------------------------------|-----------------|---------------------------------|--------------------------------|---------------------------------|
| <b>Human population: farming (%) - non farming (%)</b> |                 | 30 % - 70 %                     | 30 % - 70 %                    | 10 % - 90 %                     |
| <b>Rainfall lag</b>                                    |                 | 14 days                         | 21 days                        | 14 days                         |
| <b>Parameters estimated</b>                            | <b>Notation</b> | <b>Median (95%CrI)</b>          | <b>Median (95%CrI)</b>         | <b>Median (95%CrI)</b>          |
| Multiplying factor of the exponential function         | $A$             | 2.74e-2<br>(1.93e-3 – 6.90e-2)  | 2.63e-2<br>(1.53e-3 – 6.32e-2) | 2.67e-2<br>(2.42e-3 – 6.76e-2)  |
| Scaling factor of the exponential function             | $B$             | 2.91e-1<br>(-2.47e-2 – 5.15e-1) | 2.92e-1<br>(2.51e-2 – 5.15e-1) | 3.01e-1<br>(-1.81e-2 – 5.16e-1) |
| Human vector transmission scaling factor               | $X$             | 2.12e-2<br>(1.36e-2 – 3.42e-2)  | 2.20e-2<br>(1.38e-2 – 3.61e-2) | 1.63e-2<br>(1.03e-2 – 2.61e-2)  |
| Constant human transmission                            | $\beta_{L-H}^C$ | 4.44e-7<br>(2.89e-7 – 6.99e-7)  | 4.55e-7<br>(2.91e-7 – 7.28e-7) | 1.84e-6<br>(1.29e-6 – 2.90e-6)  |
| Number of infectious animals at $t_0$                  | $I_{ivo}$       | 184<br>(48 - 811)               | 226<br>(51-898)                | 170<br>(43-778)                 |
| <b>Predictions</b>                                     |                 |                                 |                                |                                 |
| Livestock epidemic size                                |                 | 17,723 (14,170 - 20,481)        | 17,712 (14,306 – 20,504)       | 17,833 (14,246 -20,686)         |
| Livestock incident peak                                |                 | Feb, 11-17                      | Feb, 18 - 24                   | Feb, 18 - 24                    |
| Human epidemic size                                    |                 | 9,113 (7,361 - 11,355)          | 9,314 (7,604 - 11,761)         | 9,077 (7,362 – 11,542)          |
| Human incident peak                                    |                 | Feb, 11-17 & Feb 18-24          | Feb, 18 - 24                   | Feb, 18 - 24                    |

**Table S4. Model results for the farming ( $P_{HF}=30\%$ ) and non-farming ( $P_{HNF}=70\%$ ) group.** Predicted median of total number of cases, the proportion of cases resulting from vector and direct contact transmissions, and post-epidemic seroprevalence in humans.

|                                               | Farming ( $P_{HF}=30\%$ )<br>(N=76,950) | Non-farming ( $P_{HNF}=70\%$ )<br>(N=179,550) | Total (100%)<br>(N=256,500) |
|-----------------------------------------------|-----------------------------------------|-----------------------------------------------|-----------------------------|
| <b>Total cases [percentage total]</b>         | 5,559 [61%]                             | 3,554 [39%]                                   | 9113 [100%]                 |
| Direct contact                                | 4,058 [45%]                             | 0                                             | 4,058 [45%]                 |
| Vector transmission                           | 1,501 [16%]                             | 3,554 [39%]                                   | 5,055 [55%]                 |
| <b>Post-epidemic seroprevalence (95% CrI)</b> | 7.2<br>(5.7-9.3)                        | 2.0<br>(1.4-2.7)                              | 3.6<br>(2.9-4.4)            |

**Table S5. Model results for the farming ( $P_{HF}=10\%$ ) and non-farming ( $P_{HNF}=90\%$ ) group.** Predicted median of total number of cases, the proportion of cases resulting from vector and direct contact transmissions, and post-epidemic seroprevalence in humans.

|                                               | Farming ( $P_{HF}=10\%$ )<br>(N=25,650) | Non-farming ( $P_{HNF}=90\%$ )<br>(N=230,850) | Total (100%)<br>(N=256,500) |
|-----------------------------------------------|-----------------------------------------|-----------------------------------------------|-----------------------------|
| <b>Total cases [percentage total]</b>         | 5,628 [62%]                             | 3,449 [38%]                                   | 9,077 [100%]                |
| Direct contact                                | 5,290 [58%]                             | 0                                             | 5,290 [58%]                 |
| Vector transmission                           | 338 [4%]                                | 3,449 [38%]                                   | 3,787 [42%]                 |
| <b>Post-epidemic seroprevalence (95% CrI)</b> | 21.7<br>(16.9-28.6)                     | 1.5<br>(1.1-2.1)                              | 3.5<br>(2.9-4.5)            |

**Table S6. Number of illegally imported livestock seized by the Veterinary Services and tested against RVF IgM, between May and October 2018 (Source : Mayotte Veterinary Services)**

| Month          | No. animals seized | No. of IgM positive | Proportion of IgM positive (95 % CI) |
|----------------|--------------------|---------------------|--------------------------------------|
| May 2018       | 8                  | 0                   | 0 % (0-40)                           |
| June 2018      | 31                 | 10                  | 32% (17-51)                          |
| August 2018    | 18                 | 2                   | 11% (2-36)                           |
| September 2018 | 1                  | 0                   | 0 % (0-90)                           |
| October 2018   | 5                  | 0                   | 0 % (0-54)                           |

**Table S7. Number of livestock sampled and tested against RVF IgG, between July 1st 2018 and June 30th 2019, and type of sampling**

|                                        | Total        | Annual surveillance | RVF targeted survey |
|----------------------------------------|--------------|---------------------|---------------------|
| <b>All animals</b>                     |              |                     |                     |
| July-Sept 2018                         | 180          | 180                 | 0                   |
| Oct-Dec 2018                           | 6            | 1                   | 5                   |
| Jan-Mar 2019                           | 695          | 554                 | 141                 |
| Apr-June 2019                          | 288          | 288                 | 0                   |
| <b>Total</b>                           | <b>1,169</b> | <b>1,023</b>        | <b>146</b>          |
| <b>Animals with information on age</b> |              |                     |                     |
| July-Sept 2018                         | 173          | 173                 | 0                   |
| Oct-Dec 2018                           | 1            | 0                   | 1                   |
| Jan-Mar 2019                           | 252          | 210                 | 42                  |
| Apr-June 2019                          | 67           | 67                  | 0                   |
| <b>Total</b>                           | <b>493</b>   | <b>450</b>          | <b>43</b>           |

**Table S8. Quarterly age-stratified IgG seroprevalence (95% CI) data in livestock.** [number IgG positive / number tested]

| Age-group (y) | Group number | Jul-Sept 2018 (Fig. 1D)     | Jan-Mar 2019 (Fig. 1E)      | Apr-Jun 2019 (Fig. 1 F)     |
|---------------|--------------|-----------------------------|-----------------------------|-----------------------------|
| <= 1year-old  | 1            | 0.00 (0.00-43.45) [0/5]     | 27.27 (13.15-48.15) [6/22]  | 75.00 (30.06-98.72) [3/4]   |
| 1 -2          | 2            | 0.00 0.00-13.32) [0/25]     | 17.24 (7.60-34.55) [5/29]   | 57.14 (25.05-84.18) [4/7]   |
| 2-3           | 3            | 4.17 (0.21-20.24) [1/24]    | 29.03 (16.10-46.59) [9/31]  | 73.33 (48.05-89.10) [11/15] |
| 3-4           | 4            | 0.00 (0.00-13.80) [0/24]    | 43.75 (28.17-60.67) [14/32] | 62.50 (30.57-86.32) [5/8]   |
| 4-5           | 5            | 0.00 (0.00-20.39) [0-15]    | 40.00 (21.88-61.34) [8/20]  | 60.00 (31.27-83.18) [6/10]  |
| 5-6           | 6            | 9.52 (2.65-28.91) [2/21]    | 31.58 (15.36-53.99) [6/19]  | 100.00 (51.01-100.00) [4/4] |
| 6-7           | 7            | 8.33 (0.43-35.39) [1/12]    | 13.33 (3.74-37.88) [2/15]   | 75.00 (30.06-98.72) [3/4]   |
| 7-8           | 8            | 6.67 (0.85-56.35) [1/6]     | 43.75 (23.10-66.82) [7/16]  | 40.00 (11.76-76.93) [2/5]   |
| 8-9           | 9            | 0.00 (0.00-27.75) [0/10]    | 30.77 (12.68-57.63) [4/13]  | 100.00 (34.24-100.00) [2/2] |
| > 9 years-old | 10           | 45.16 (29.16-62.23) [14/31] | 65.45 (52.25-76.64) [36/55] | 87.50 (52.91-99.36) [7/8]   |

**Table S9. Weekly number of human cases testing RVF RT-PCR between November 2018 and August 2019, in Mayotte**

| Week number (Year-week) | No. of total human cases | No. of human cases reporting a direct contact with animals or their tissues | No. of human cases reporting no direct contact with animals or their tissues | Not investigated |
|-------------------------|--------------------------|-----------------------------------------------------------------------------|------------------------------------------------------------------------------|------------------|
| 2018-47                 | 1                        | -                                                                           | 1                                                                            | -                |
| 2018-51                 | 2                        | -                                                                           | 2                                                                            | -                |
| 2018-52                 | 1                        | 1                                                                           | -                                                                            | -                |
| 2019-01                 | 1                        | 1                                                                           | -                                                                            | -                |
| 2019-02                 | 1                        | 1                                                                           | -                                                                            | -                |
| 2019-03                 | 8                        | 4                                                                           | 3                                                                            | 1                |
| 2019-04                 | 8                        | 7                                                                           | 1                                                                            | -                |
| 2019-05                 | 7                        | 5                                                                           | 1                                                                            | 1                |
| 2019-06                 | 17                       | 11                                                                          | 4                                                                            | 2                |
| 2019-07                 | 18                       | 10                                                                          | 8                                                                            | -                |
| 2019-08                 | 16                       | 12                                                                          | 2                                                                            | 2                |
| 2019-09                 | 11                       | 5                                                                           | 5                                                                            | 1                |
| 2019-10                 | 9                        | 5                                                                           | 2                                                                            | 2                |
| 2019-11                 | 9                        | 4                                                                           | 2                                                                            | 3                |
| 2019-12                 | 5                        | 4                                                                           | -                                                                            | 1                |
| 2019-13                 | 3                        | 3                                                                           | -                                                                            | -                |
| 2019-14                 | 1                        | 1                                                                           | -                                                                            | -                |
| 2019-15                 | 4                        | 2                                                                           | 2                                                                            | -                |
| 2019-16                 | 4                        | 1                                                                           | 2                                                                            | 1                |
| 2019-17                 | 3                        | 2                                                                           | -                                                                            | 1                |
| 2019-18                 | 2                        | 1                                                                           | -                                                                            | 1                |
| 2019-19                 | 1                        | 1                                                                           | -                                                                            | -                |

|         |   |   |   |   |
|---------|---|---|---|---|
| 2019-20 | 4 | - | 4 | - |
| 2019-21 | 1 | - | 1 | - |
| 2019-22 | 1 | 1 | - | - |
| 2019-23 | 1 | - | 1 | - |
| 2019-26 | 1 | 1 | - | - |
| 2019-27 | 1 | 1 | - | - |
| 2019-28 | 1 | 1 | - | - |
| 2019-31 | 1 | 1 | - | - |

## SI References

1. R. Métras, *et al.*, Drivers for Rift Valley fever emergence in Mayotte: A Bayesian modelling approach. *PLoS Negl. Trop. Dis.* **11**, e0005767 (2017).
2. Météofrance. Données décennales agrométéorologiques. Available at : [https://donneespubliques.meteofrance.fr/?fond=produit&id\\_produit=113&id\\_rubrique=37](https://donneespubliques.meteofrance.fr/?fond=produit&id_produit=113&id_rubrique=37). Accessed 23 September 2019 (2019).
3. C. Talla, *et al.*, Statistical modeling of the abundance of vectors of West African Rift Valley fever in Barkédji, Senegal. *PLoS One.* **12**, e114047 (2014).
4. D. Diallo, *et al.*, Temporal distribution and spatial pattern of abundance of the Rift Valley fever and West Nile fever vectors in Barkedji, Senegal. *J Vector Ecol.* **2**, 426-436 (2011).
5. Camacho A and Funk S. fitR: Tool box for fitting dynamic infectious disease models to time series. R package version 0.1.
6. Institut National de la statistique et des études économiques (Insee), Habitants à Mayotte. Available at : <https://www.insee.fr/fr/statistiques/3286558#documentation>, Accessed 05 October 2019 (2017).
7. Direction de l'Alimentation, de l'Agriculture et de la Forêt, Mayotte. Recensement Agricole 2010. Available at: <http://daaf.mayotte.agriculture.gouv.fr/Recensement-Agricole-2010,23> Accessed 07 July 2020 (2010).
8. T. Ikegami, S. Makino, The pathogenesis of Rift Valley fever. *Viruses*, **3**, 493–519 (2011).
9. T. Lernout, *et al.*, Rift Valley Fever in Humans and Animals in Mayotte, an Endemic Situation? *PLoS ONE.* **8**, e74192 (2013).
10. World Health Organization, R&D Blueprint, Target Product Profiles for Rift Valley Fever Virus Vaccines – version 3. Available at : [https://www.who.int/docs/default-source/blue-print/call-for-comments/tpp-rift-valley-fever-vaccines-draft3-0pc.pdf?sfvrsn=f2f3b314\\_2](https://www.who.int/docs/default-source/blue-print/call-for-comments/tpp-rift-valley-fever-vaccines-draft3-0pc.pdf?sfvrsn=f2f3b314_2) Accessed 06 March 2020 (2019).
11. B. Dingu, B. A. Lubisi, T. Ikegami, Rift Valley fever vaccines : current and future needs. *Curr Opin Virol.* **29**, 8-15 (2018).
